# Supplementary material for: Presence of Phthalate Esters Used as Common Plasticisers in Maltese Shoreline Sand
Source: MDPI journal article supplement (doi:10.3390/environments10060094), 2023-06-01
Supplement: s1 [file s1]

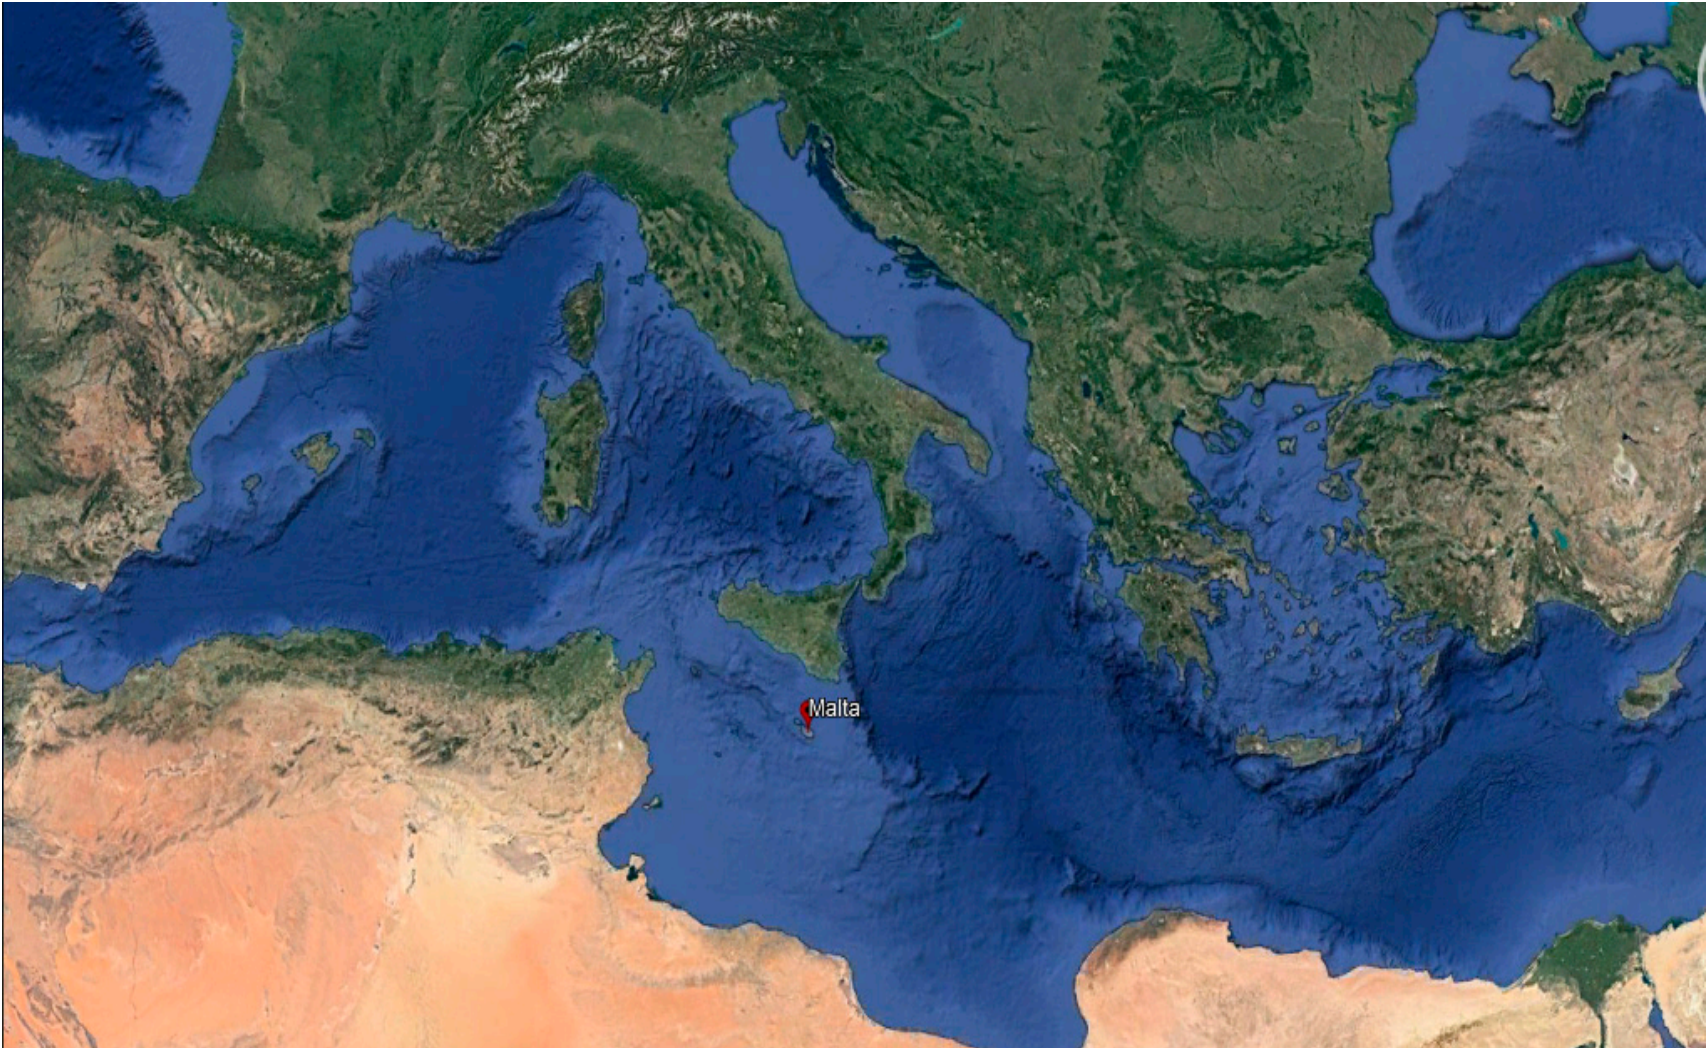

**Figure S1.** The geographical location of Malta in the centre of the Mediterranean.

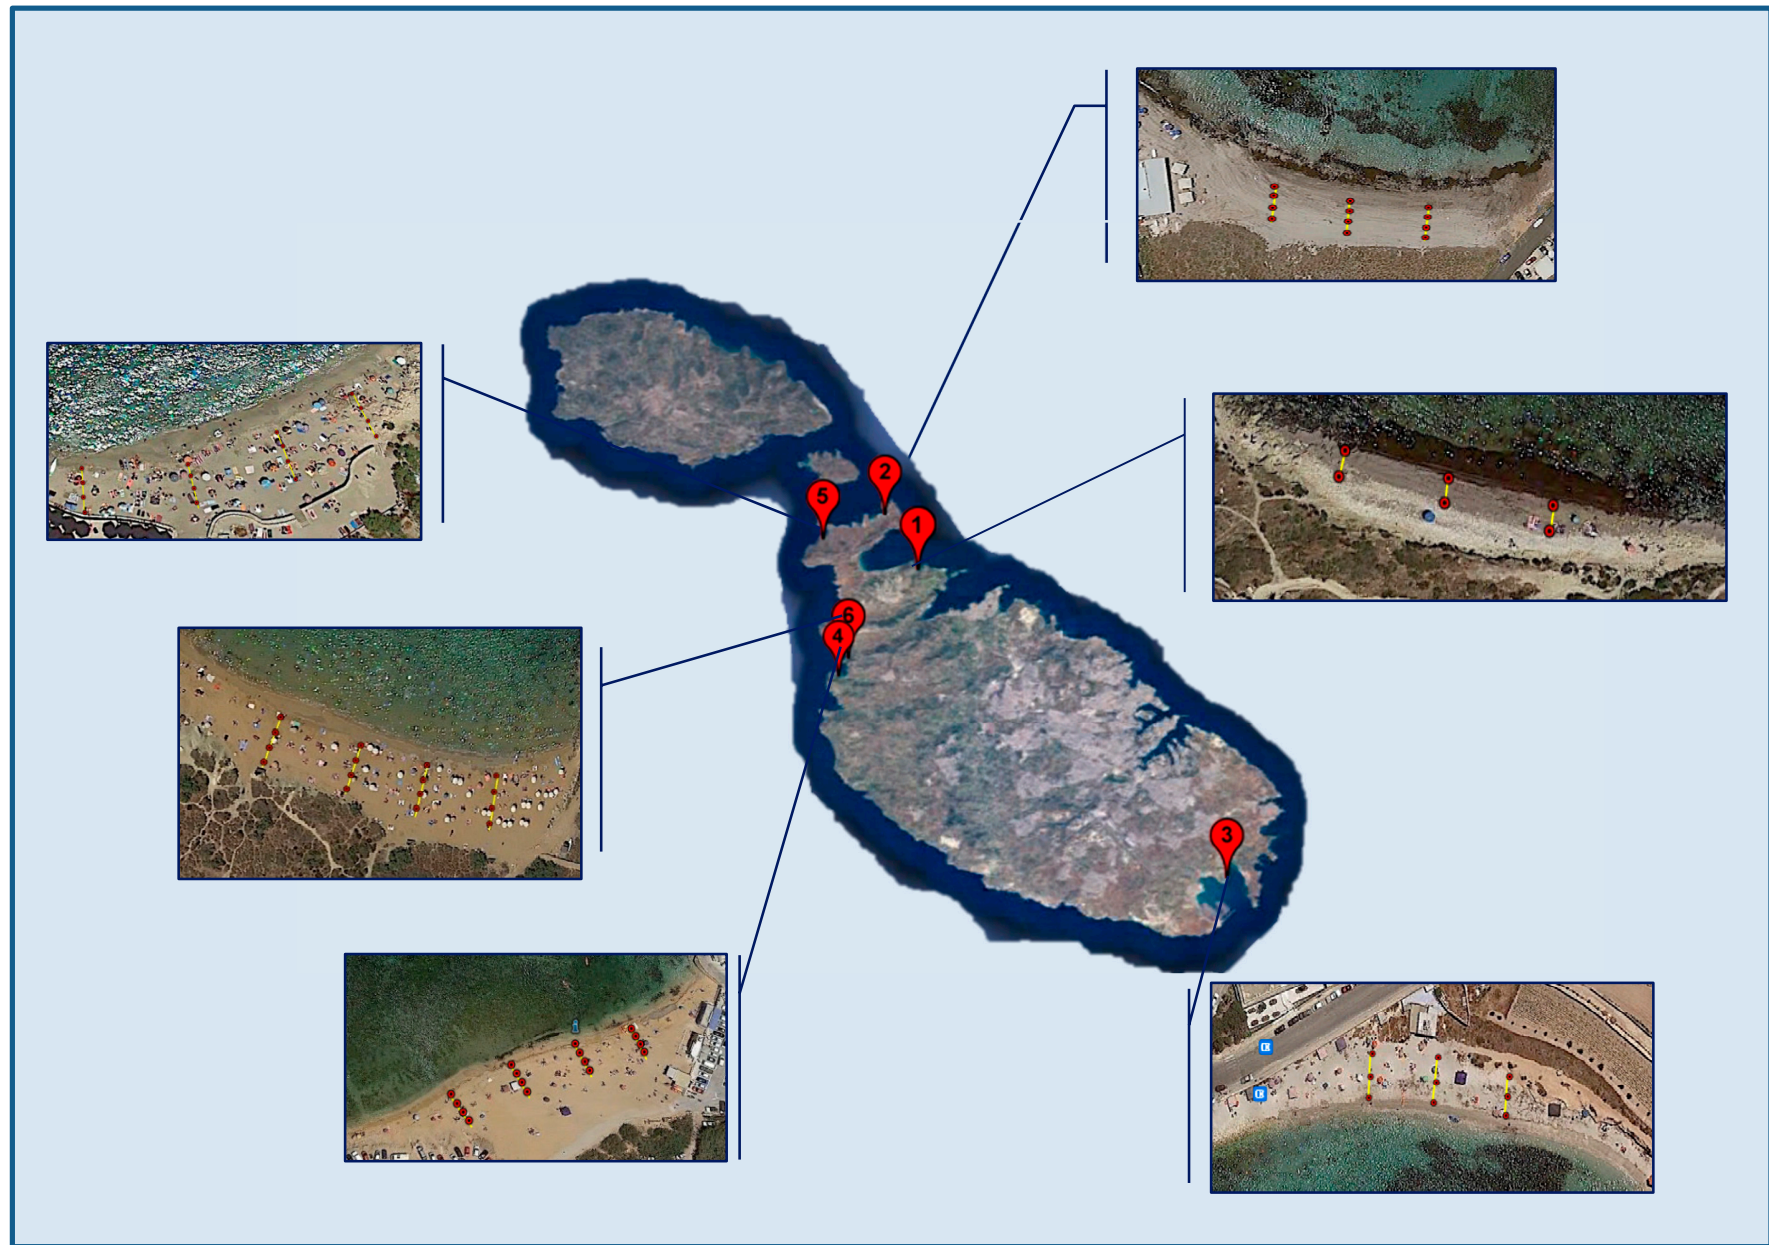

**Figure S2.** The location of the Maltese beaches sampled; (Key: 1-Imġiebaħ 2- White Tower, 3- Għar Aħmar, 4- Ġnejna, 5- Paradise Bay, 6- Riviera ; ● represents the quadrats; — represents the sampling stations assembled)
